# Supplementary material
Source: Springer Nature journal article supplement (https://www.springermedizin.de/resource/supplementary/12879_2008_832_MOESM1_ESM.pdf/9449886)

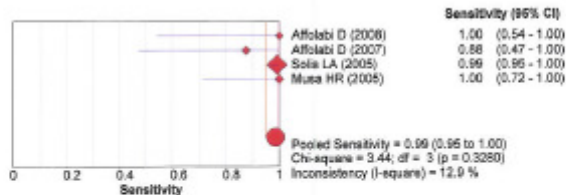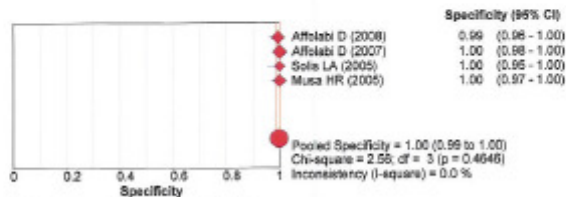

1a) Nitrate reductase assay (NRA)

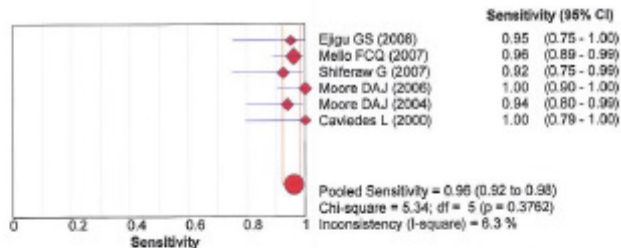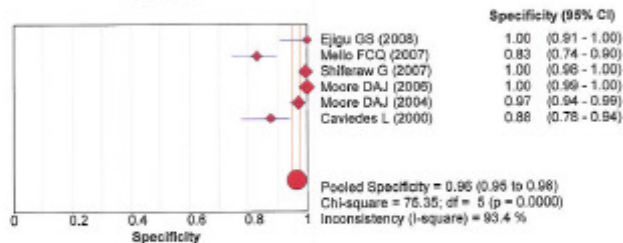

1b) Microscopic Observation Drug Susceptibility (MODS)

Supplement: MOESM1 [file 9449886]
